# Supplementary material for: Antifungal Activity of Isolated Compounds from the Leaves of Combretum erythrophyllum (Burch.) Sond. and Withania somnifera (L.) Dunal against Fusarium Pathogens
Source: Molecules. 2021 Aug 5;26(16):4732. doi: 10.3390/molecules26164732 (PMC8401019; doi:10.3390/molecules26164732)

Article

# Antifungal activity of isolated compounds from the leaves of *Combretum erythrophyllum* (Burch.) Sond. and *Withania somnifera* (L.) Dunal against *Fusarium* pathogens

Hlabana A. Seepe<sup>1,2</sup> \*, Tselane G. Ramakadi<sup>2</sup>, Charity M. Lebepe<sup>2</sup>, Stephen O. Amoo<sup>1,3,4</sup> and Winston Nxumalo<sup>2</sup> \*

<sup>1</sup> Agricultural Research Council—Vegetables, Industrial and Medicinal Plants, Roodeplaat, Private Bag X293, Pretoria 0001, South Africa

<sup>2</sup> Department of Chemistry, University of Limpopo, Private Bag X1106, Sovenga, 0727, Polokwane, South Africa

<sup>3</sup> Indigenous Knowledge Systems Centre, Faculty of Natural and Agricultural Sciences, North-West University, Private Bag X2046, Mmabatho 2735, South Africa

<sup>4</sup> Department of Botany and Plant Biotechnology, Faculty of Science, University of Johannesburg, P.O. Box 524, Auckland Park 2006, South Africa

\* Correspondence: seepeh@arc.agric.za; Tel.: +27 12 808 8000 (H.A.S.); winston.nxumalo@ul.ac.za; Tel.: +27 015 268 2331 (W.N)

Received: 2 July 2021; Accepted: 30 July 2021; Published: 4 August 2021

## Supplementary Materials

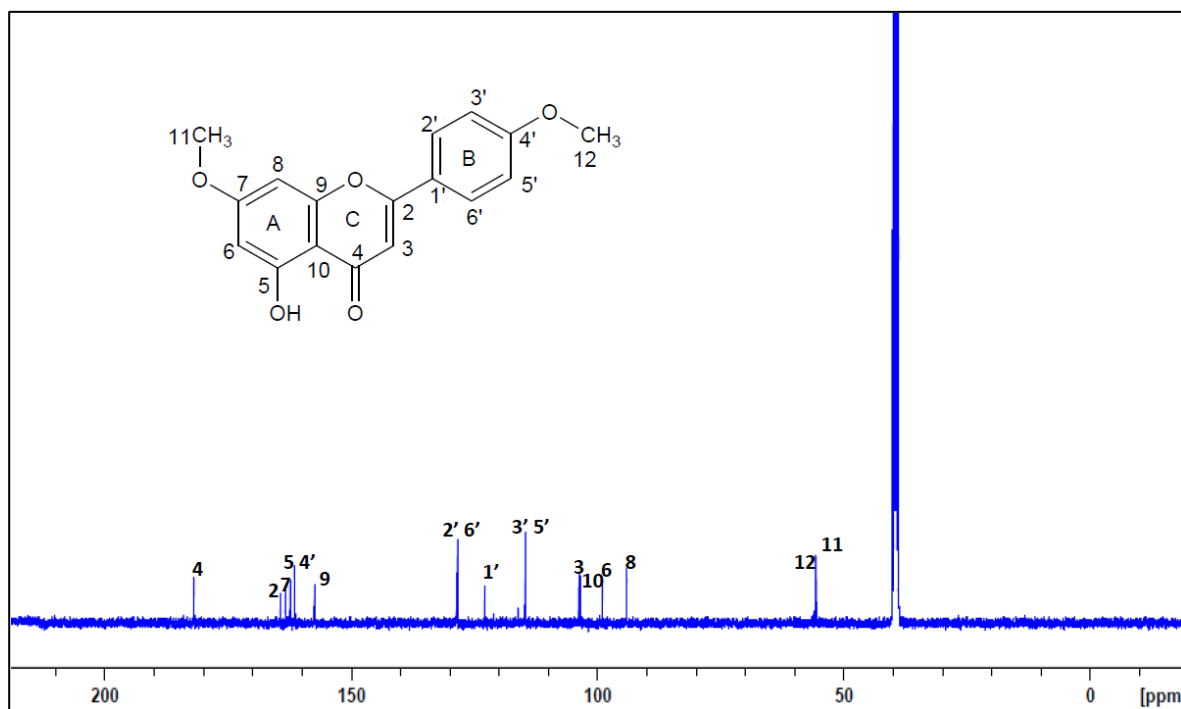

Figure S1. <sup>13</sup>C-NMR spectrum of flavonoid compound isolated from *C. erythrophyllum* leaf acetone extract.

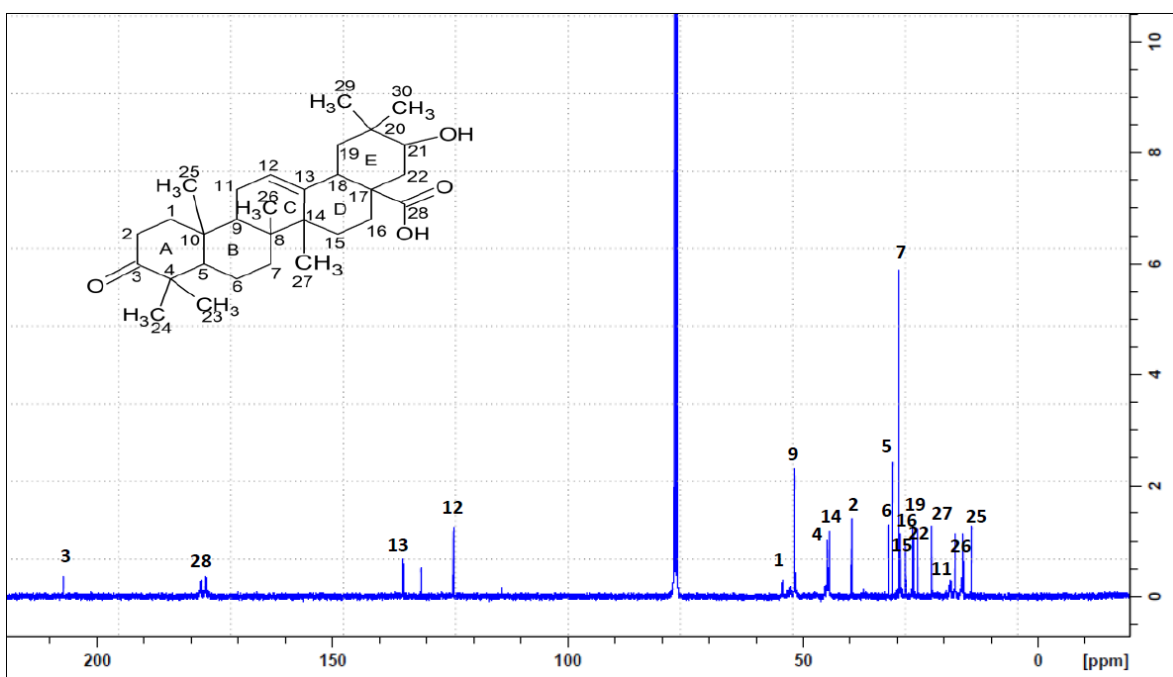

Figure S2. <sup>13</sup>C-NMR spectrum of compound B showing similarities with reported literature data

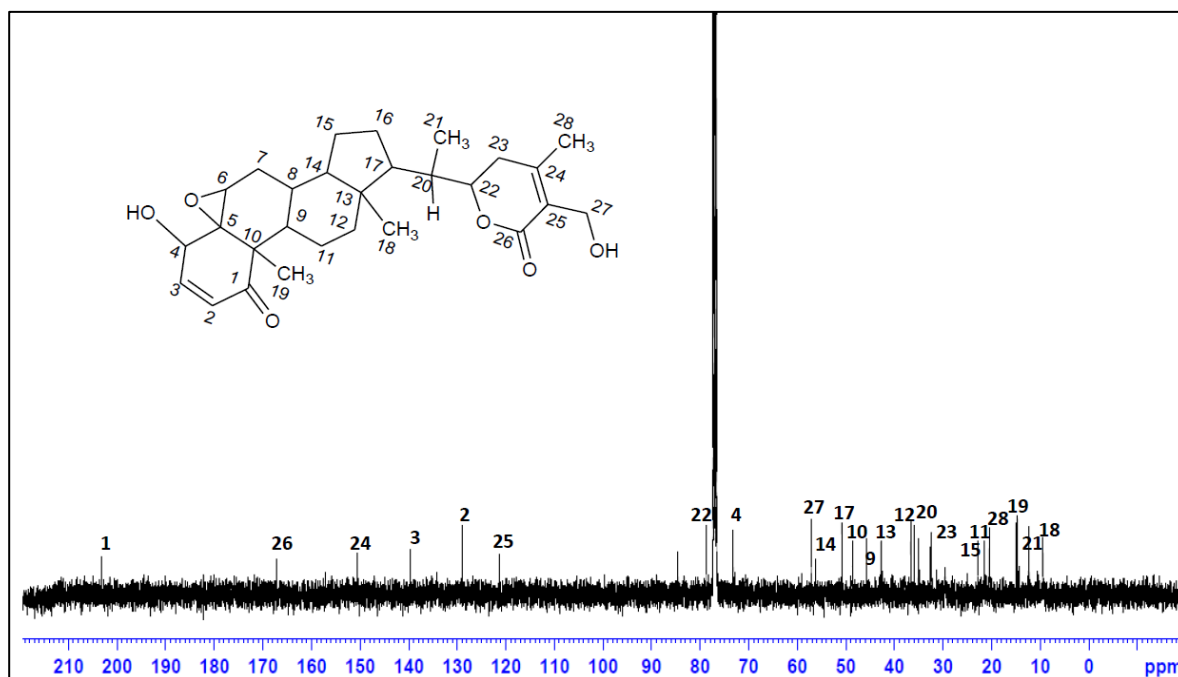

**Figure S3.**  $^{13}\text{C}$ -NMR spectrum of withanolide compound isolated from *W. somnifera* leaf ethyl acetate extract.

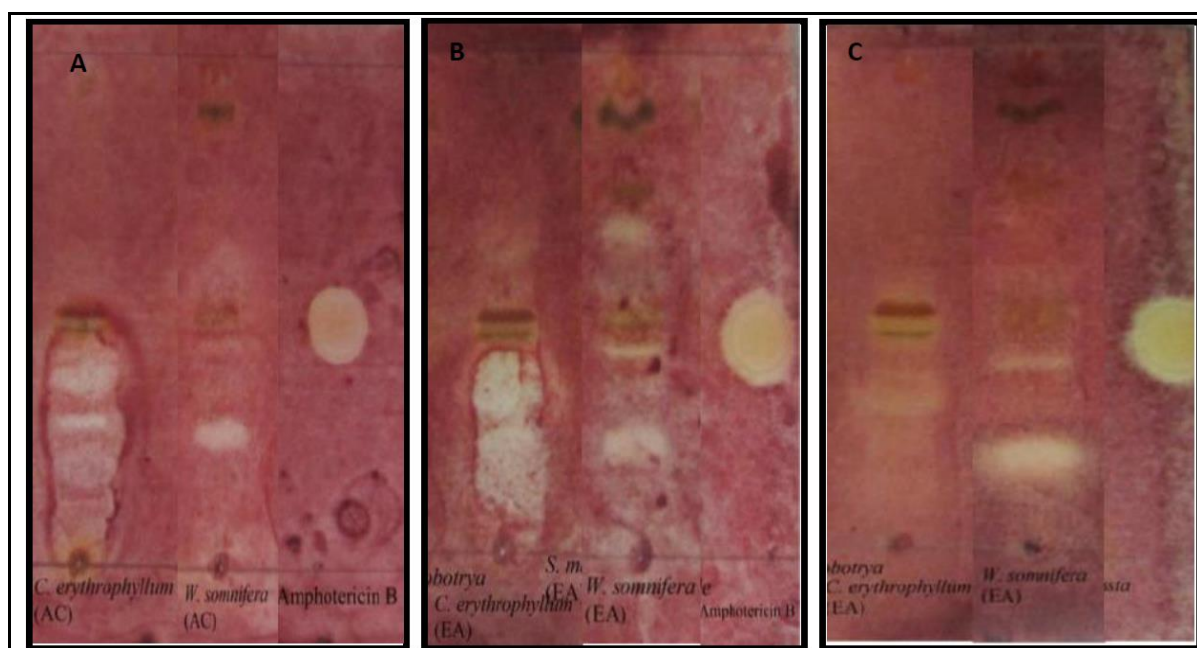

**Figure S4.** Thin Layer Chromatography (TLC) Bioautography of *Combretum erythrophyllum* and *Withania somnifera* extracts treated with different *Fusarium* pathogens. (A): Antifungal activity of *C. erythrophyllum* and *W. somnifera* acetone extracts against *F. verticilloides*. (B): Antifungal activity of *C. erythrophyllum* and *W. somnifera* ethyl acetate extracts against *F. proliferatum*. (C): Antifungal activity of *C. erythrophyllum* and *W. somnifera* ethyl acetate extracts against *F. solani*. Amphotericin B was included as positive control.

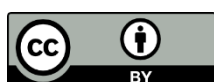

Supplement: Supplementary file 1 [file molecules-26-04732-s001.zip › molecules-1305449-supplementary.pdf]
